# Supplementary material for: Post-COVID-19 Symptoms in Adults with Asthma—Systematic Review
Source: MDPI journal article supplement (doi:10.3390/biomedicines11082268), 2023-08-14
Supplement: s1 [file s1]

# Supplementary Materials

**Table S1.** Key words used in electronic search of the MEDLINE/PubMed, EMBASE, Web of Science, CINAHL and Scopus Scholar—publication date from 1 January 2020 to 1 June 2022.

|    |                                      |
|----|--------------------------------------|
|    | <b>COVID Terms</b>                   |
| 1  | SARS-CoV-2                           |
| 2  | COVID-19                             |
| 3  | COVID                                |
| 4  | coronavirus                          |
| 5  | post-COVID-19                        |
| 6  | post-COVID                           |
| 7  | long-COVID-19                        |
| 8  | long-COVID                           |
| 9  | 1 OR 2 OR 3 OR 4 OR 5 OR 6 OR 7 OR 8 |
|    | <b>Length Terms</b>                  |
| 10 | Long                                 |
| 11 | Late                                 |
| 12 | Persistent                           |
| 13 | Post                                 |
| 14 | Chronic                              |
| 15 | 10 OR 11 OR 12 OR 13 OR 14           |
|    | <b>Additional Terms</b>              |
| 16 | symptoms                             |
| 17 | complications                        |
| 18 | consequences                         |
| 19 | 16 OR 17 OR 18                       |
| 20 | asthma                               |
|    | <b>Synthesis</b>                     |
| 21 | 9 AND 15 AND 19 AND 20               |
